# Supplementary material for: Mental and Substance Use Disorders in Sub-Saharan Africa: Predictions of Epidemiological Changes and Mental Health Workforce Requirements for the Next 40 Years
Source: PubMed Central journal article supplement (PMC4195720; doi:10.1371/journal.pone.0110208), 2014-10-13
Supplement: pone.0110208.s001.pdf [file pone.0110208.s001.pdf]

## Supplementary Information

Table S1: List of GBD Sub-Saharan Africa regions and countries[1]

| Region                       | Countries                                                                                                                                                                                               |
|------------------------------|---------------------------------------------------------------------------------------------------------------------------------------------------------------------------------------------------------|
| Sub-Saharan Africa, Central  | Angola, Central African Republic, Congo, Democratic Republic of the Congo, Equatorial Guinea, Gabon                                                                                                     |
| Sub-Saharan Africa, East     | Burundi, Comoros, Djibouti, Eritrea, Ethiopia, Kenya, Madagascar, Malawi, Mozambique, Rwanda, Somalia, South Sudan, Sudan, Tanzania, Uganda, Zambia                                                     |
| Sub-Saharan Africa, Southern | Botswana, Lesotho, Namibia, South Africa, Swaziland, Zimbabwe                                                                                                                                           |
| Sub-Saharan Africa, West     | Benin, Burkina Faso, Cameroon, Cape Verde, Chad, Côte d'Ivoire, Ghana, Guinea, Guinea-Bissau, Liberia, Mali, Mauritania, Niger, Nigeria, Sao Tome and Principe, Senegal, Sierra Leone, The Gambia, Togo |

Table S2: Population data: 2010 and 2050 UN population by region

| Region       | Total population |               | Population 5-19 years |             |
|--------------|------------------|---------------|-----------------------|-------------|
|              | 2010             | 2050          | 2010                  | 2050        |
| SSA Central  | 98,041,204       | 249,836,218   | 37,549,425            | 81,588,522  |
| SSA East     | 357,361,615      | 744,241,063   | 135,303,449           | 212,183,073 |
| SSA Southern | 70,352,580       | 84,161,080    | 22,987,773            | 20,136,630  |
| SSA West     | 338,971,179      | 679,859,364   | 127,245,433           | 190,106,084 |
| Total SSA    | 864,726,578      | 1,758,097,725 | 323,086,080           | 504,014,309 |

Table S3: List of GBD mental and substance use disorders[1]

| <b>Mental disorders</b>                                                                                                                                                                                                                                                                                                                                                                                                                                                                                                                                                                                                                   | <b>Drug use disorders</b>                                                                                                                               | <b>Alcohol use disorders</b> |
|-------------------------------------------------------------------------------------------------------------------------------------------------------------------------------------------------------------------------------------------------------------------------------------------------------------------------------------------------------------------------------------------------------------------------------------------------------------------------------------------------------------------------------------------------------------------------------------------------------------------------------------------|---------------------------------------------------------------------------------------------------------------------------------------------------------|------------------------------|
| <p>Schizophrenia</p> <p>Unipolar depressive disorders</p> <ul style="list-style-type: none"> <li>• Major depressive disorders</li> <li>• Dysthymia</li> </ul> <p>Bipolar affective disorder</p> <p>Anxiety disorders</p> <p>Eating disorders</p> <p>Pervasive development disorders</p> <ul style="list-style-type: none"> <li>• Autism</li> <li>• Asperger's syndrome</li> </ul> <p>Childhood behavioural disorders</p> <ul style="list-style-type: none"> <li>• Attention-deficit hyperactivity disorder</li> <li>• Conduct disorder</li> </ul> <p>Idiopathic intellectual disability</p> <p>Other mental and behavioural disorders</p> | <p>Opioid use disorders</p> <p>Cocaine use disorders</p> <p>Amphetamine use disorders</p> <p>Cannabis use disorders</p> <p>Other drug use disorders</p> | <p>Alcohol use disorders</p> |

Table S4: Summary of pooled prevalence of selected mental and substance use disorders in Sub-Saharan Africa from GBD 2010, by region and adjusted for comorbidity

| <b>Region</b>   | <b>Central</b> |             | <b>East</b> |             | <b>Southern</b> |             | <b>West</b> |             |
|-----------------|----------------|-------------|-------------|-------------|-----------------|-------------|-------------|-------------|
| <b>Disorder</b> | <b>2010</b>    | <b>2050</b> | <b>2010</b> | <b>2050</b> | <b>2010</b>     | <b>2050</b> | <b>2010</b> | <b>2050</b> |
| Schizophrenia   | 0.27%          | 0.30%       | 0.26%       | 0.29%       | 0.27%           | 0.31%       | 0.27%       | 0.30%       |
| Bipolar         | 0.88%          | 0.87%       | 0.88%       | 0.87%       | 0.88%           | 0.87%       | 0.87%       | 0.86%       |
| Depression      | 5.00%          | 5.22%       | 4.76%       | 5.02%       | 4.39%           | 4.62%       | 3.67%       | 3.86%       |
| Alcohol         | 0.88%          | 0.89%       | 0.64%       | 0.64%       | 1.44%           | 1.49%       | 0.40%       | 0.40%       |
| Opioids         | 0.13%          | 0.12%       | 0.13%       | 0.12%       | 0.19%           | 0.17%       | 0.13%       | 0.12%       |
| Conduct         | 1.88%          | 1.90%       | 1.88%       | 1.90%       | 1.88%           | 1.90%       | 1.86%       | 1.86%       |
| ADHD            | 1.00%          | 1.03%       | 1.00%       | 1.03%       | 1.03%           | 1.05%       | 1.03%       | 1.05%       |

Table S5: Treatment coverage targets and care packages (taken from Bruckner et al<sup>1</sup>)

| Epidemiology & Target population |                                        | Inpatient service use / needs                             |                                               |                                                 |                                               |                                                     |                                               |                                          |                                               | Outpatient service use / needs  |                                                 |                                 |                                                 |                               |                                                 |                               |                                                 |                               |                                               |
|----------------------------------|----------------------------------------|-----------------------------------------------------------|-----------------------------------------------|-------------------------------------------------|-----------------------------------------------|-----------------------------------------------------|-----------------------------------------------|------------------------------------------|-----------------------------------------------|---------------------------------|-------------------------------------------------|---------------------------------|-------------------------------------------------|-------------------------------|-------------------------------------------------|-------------------------------|-------------------------------------------------|-------------------------------|-----------------------------------------------|
|                                  |                                        | General hospital inpatient unit (acute care) <sup>2</sup> |                                               | Community psychiatric (acute care) <sup>3</sup> |                                               | Community residential care (long stay) <sup>4</sup> |                                               | Mental hospital (long stay) <sup>5</sup> |                                               | Primary health care (treatment) |                                                 | Primary health care (screening) |                                                 | Psychosocial treatment        |                                                 | Hospital outpatient care      |                                                 | Day care                      |                                               |
|                                  | Treatment coverage target <sup>6</sup> | Service coverage <sup>7</sup>                             | Utilisation rate (days per year) <sup>8</sup> | Service coverage <sup>7</sup>                   | Utilisation rate (days per year) <sup>8</sup> | Service coverage <sup>7</sup>                       | Utilisation rate (days per year) <sup>8</sup> | Service coverage <sup>7</sup>            | Utilisation rate (days per year) <sup>8</sup> | Service coverage <sup>7</sup>   | Utilisation rate (visits per year) <sup>9</sup> | Service coverage <sup>7</sup>   | Utilisation rate (visits per year) <sup>9</sup> | Service coverage <sup>7</sup> | Utilisation rate (visits per year) <sup>9</sup> | Service coverage <sup>7</sup> | Utilisation rate (visits per year) <sup>9</sup> | Service coverage <sup>7</sup> | Utilisation rate (days per year) <sup>9</sup> |
| Schizophrenia                    | 80%                                    | 0%                                                        | 0                                             | 15%                                             | 28                                            | 2.5%                                                | 180                                           | 2%                                       | 90                                            | 30%                             | 6                                               | 0%                              | 0                                               | 30%                           | 8                                               | 50%                           | 12                                              | 7.5%                          | 100                                           |
| Bipolar                          | 80%                                    | 0%                                                        | 0                                             | 15%                                             | 28                                            | 2.5%                                                | 180                                           | 2%                                       | 90                                            | 30%                             | 6                                               | 0%                              | 0                                               | 30%                           | 8                                               | 50%                           | 12                                              | 7.5%                          | 100                                           |
| Depression                       | 33%                                    | 0%                                                        | 0                                             | 2%                                              | 14                                            | 0.5%                                                | 90                                            | 0%                                       | 0                                             | 30%                             | 7                                               | 7%                              | 1                                               | 20%                           | 6                                               | 20%                           | 7                                               | 1%                            | 50                                            |
| Alcohol dependence               | 25%                                    | 0%                                                        | 0                                             | 2%                                              | 5                                             | 0%                                                  | 0                                             | 0%                                       | 0                                             | 0%                              | 0                                               | 2%                              | 1                                               | 25%                           | 3                                               | 10%                           | 2                                               | 0%                            | 0                                             |
| Opioid dependence                | 50%                                    | 10%                                                       | 8                                             | 0%                                              | 0                                             | 2%                                                  | 60                                            | 0%                                       | 0                                             | 75%                             | 24                                              | 0%                              | 0                                               | 25%                           | 3                                               | 25%                           | 11                                              | 6%                            | 26                                            |
| Childhood conduct disorder       | 20%                                    | 0%                                                        | 0                                             | 2%                                              | 2.7                                           | 0%                                                  | 0                                             | 0%                                       | 0                                             | 100%                            | 6.2                                             | 0%                              | 0                                               | 0%                            | 0                                               | 25%                           | 3                                               | 2%                            | 6                                             |
| Childhood ADHD                   | 20%                                    | 0%                                                        | 0                                             | 2%                                              | 2.7                                           | 0%                                                  | 0                                             | 0%                                       | 0                                             | 100%                            | 6.2                                             | 0%                              | 0                                               | 0%                            | 0                                               | 25%                           | 3                                               | 2%                            | 6                                             |

<sup>1</sup> Service delivery models for each disorder were taken directly from Bruckner and colleagues' (2011) *Target mental health service delivery models in low- and middle-income countries for the mental, neurological and substance abuse disorders prioritized by the World Health Organization*, which were based on the World Health Organization's sub-regional cost-effectiveness[2] studies and international needs assessment research in developing countries.

<sup>2</sup> Treatment in a general, non-psychiatric bed in a general hospital (for opioid dependence only).

<sup>3</sup> Treatment in a psychiatric bed in a community or general hospital.

<sup>4</sup> Long stay bed based mental health care in a community residential setting.

<sup>5</sup> Long stay bed based mental health care in a psychiatric hospital.

<sup>6</sup> The percentage of prevalent cases requiring or presenting for any treatment.

<sup>7</sup> The percentage of treated cases needing care in this specific service setting in a year.

<sup>8</sup> The average number of bed days used per case per year for cases treated in this specific service setting.

<sup>9</sup> The average number of consultations or sessions per case per year for cases treated in this specific service setting.

Table S6: Staffing ratios

| Human resource category          | Staffing proportion by health care setting |                             |                 |          |                | No. of staff per 25 bed inpatient ward |
|----------------------------------|--------------------------------------------|-----------------------------|-----------------|----------|----------------|----------------------------------------|
|                                  | Primary care                               | Ancillary care <sup>1</sup> | Outpatient care | Day Care | Inpatient care |                                        |
| Psychiatrist                     | 2%                                         | 5%                          | 10%             | 5%       | 10%            | 1                                      |
| Other physician / doctor         | 15%                                        | 5%                          | 15%             | 5%       | 10%            | 0.5                                    |
| Nurse                            | 50%                                        | 30%                         | 30%             | 50%      | 50%            | 4                                      |
| Psychologist                     | 3%                                         | 5%                          | 10%             | 10%      | 10%            | 0.5                                    |
| Other psychosocial workers       | 10%                                        | 25%                         | 20%             | 20%      | 10%            | 0.5                                    |
| <i>Other providers / workers</i> | 20%                                        | 30%                         | 15%             | 10%      | 10%            | 1                                      |
| Total                            | 100%                                       | 100%                        | 100%            | 100%     | 100%           | 7.5                                    |

Source: Dan Chisholm personal correspondence ("The default distribution in the mhGAP costing tool")[3]

<sup>1</sup> Staffing ratios for the ancillary care category from the mhGAP costing tool were applied to care packages for psychosocial treatment from Bruckner et al[2] (as per Table S3).

Key algorithms:

- Target population = total population x disorder prevalence (%) x treatment coverage target (%)
- Number of bed days (inpatients) or sessions (outpatients) per year= target population x % of cases using services x average rate of use (days or sessions per year)
- The number of FTE staff required to deliver outpatient mental health care was calculated as: number of sessions per year / number of consultations per day / 240 working days per year (from mhGAP) X staffing ratio (from mhGAP)
- The number of FTE staff required to deliver inpatient/residential mental health care was calculated as: number of bed-days / 0.85 (85% bed occupancy rate as per Bruckner et al) / 365 service days per annum / 25 beds in unit x number of staff per unit (7.5 per 25 beds as per mhGAP) x staffing ratio (proportion of nurses, doctors, and other professionals in that setting from mhGAP)

Figure S1: Change in burden distribution of communicable diseases due to population ageing and growth

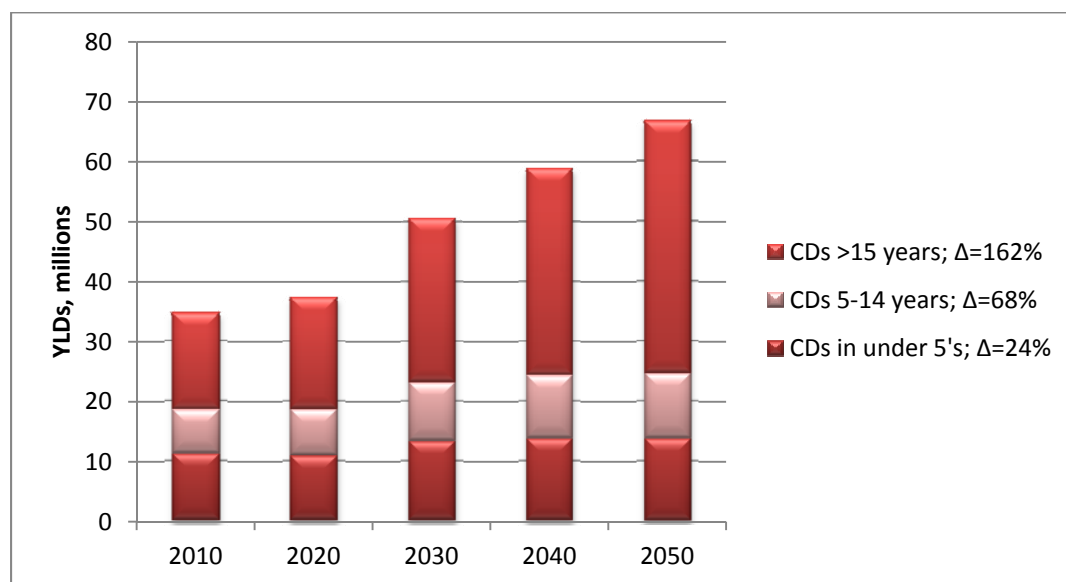

Note: CDs include all communicable, maternal, neonatal and nutritional diseases

Table S7: Estimated increase in mental and substance use disorders YLD, 2010-2050

| Region                       | 2010       | 2020       | 2030       | 2040       | 2050       |
|------------------------------|------------|------------|------------|------------|------------|
| Sub-Saharan Africa, Central  | 2,330,646  | 3,149,658  | 4,226,315  | 5,516,692  | 6,906,692  |
| Sub-Saharan Africa, East     | 8,373,367  | 10,988,065 | 13,968,937 | 17,051,601 | 20,009,750 |
| Sub-Saharan Africa, Southern | 1,845,833  | 1,995,444  | 2,139,705  | 2,259,494  | 2,353,826  |
| Sub-Saharan Africa, West     | 6,757,997  | 8,744,972  | 10,980,392 | 13,285,815 | 15,462,953 |
| Sub-Saharan Africa, Total    | 19,316,225 | 24,893,211 | 31,320,859 | 38,087,363 | 44,690,958 |

Figure S2: Change in mental and substance use disorders relative to all NCDs

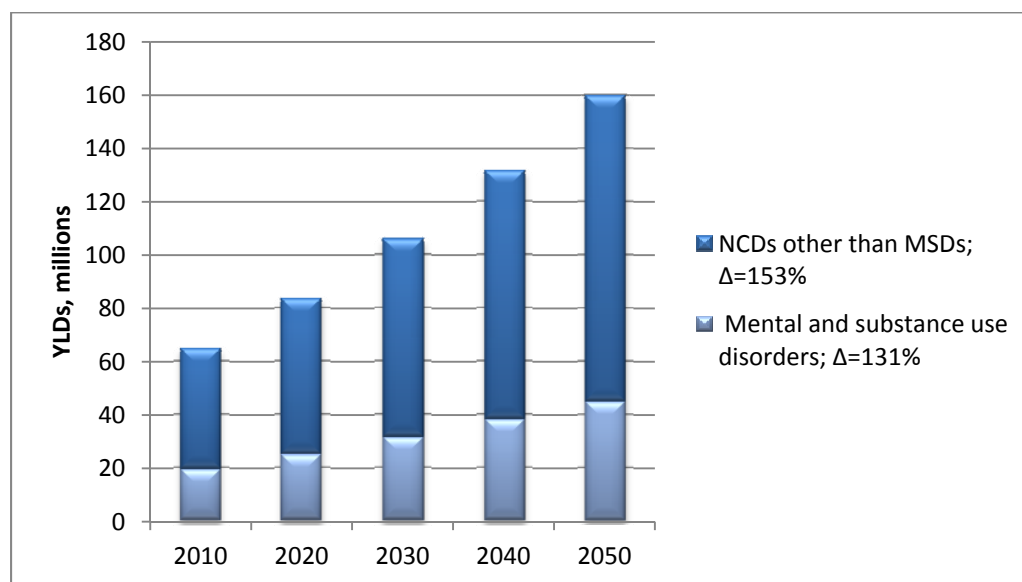

#### References:

1. Murray CJ, Vos T, Lozano R, Naghavi M, Flaxman AD, et al. (2012) Disability-adjusted life years (DALYs) for 291 diseases and injuries in 21 regions, 1990–2010: a systematic analysis for the Global Burden of Disease Study 2010. *The Lancet* 380: 2197-2223.
2. Bruckner TA, Scheffler RM, Shen G, Yoon J, Chisholm D, et al. (2011) The mental health workforce gap in low-and middle-income countries: a needs-based approach. *Bulletin of the World Health Organization* 89: 184-194.
3. Chisholm D. (2014) The default distribution in the mhGAP costing tool.
